# Supplementary material for: Psychiatric morbidity among women in Norwegian prisons, 2010–2019: a register-based study
Source: Springer Nature journal article supplement (doi:10.1186/s12888-023-04886-7), 2023-06-02
Supplement: MOESM1 [file 25440686]

**Supplementary table 1 (S1),** One-year prevalence of psychiatric morbidity by annual new entries to prison presented triannually, 2010-2019 (n= 6,946).

| Characteristic                                | 2010,<br>n = 848 <sup>1</sup> | 2011,<br>n = 720 <sup>1</sup> | 2012,<br>n = 763 <sup>1</sup> | 2013,<br>n = 698 <sup>1</sup> | 2014,<br>n = 637 <sup>1</sup> | 2015,<br>n = 632 <sup>1</sup> | 2016,<br>n = 771 <sup>1</sup> | 2017,<br>n = 706 <sup>1</sup> | 2018,<br>n = 623 <sup>1</sup> | 2019,<br>n = 548 <sup>1</sup> |
|-----------------------------------------------|-------------------------------|-------------------------------|-------------------------------|-------------------------------|-------------------------------|-------------------------------|-------------------------------|-------------------------------|-------------------------------|-------------------------------|
| Age, years                                    | 35 (26, 44)                   | 37 (27, 45)                   | 36 (27, 44)                   | 37 (28, 46)                   | 37 (28, 45)                   | 37 (29, 46)                   | 38 (30, 47)                   | 39 (30, 48)                   | 38 (30, 47)                   | 39 (29, 47)                   |
| History of at least one psychiatric diagnosis | 339 (40%)                     | 347 (48%)                     | 341 (45%)                     | 324 (46%)                     | 338 (53%)                     | 343 (54%)                     | 417 (54%)                     | 404 (57%)                     | 358 (57%)                     | 296 (54%)                     |
| Substance Use Disorders                       | 267 (31%)                     | 269 (37%)                     | 271 (36%)                     | 261 (37%)                     | 284 (45%)                     | 280 (44%)                     | 341 (44%)                     | 308 (44%)                     | 286 (46%)                     | 231 (42%)                     |
| Alcohol Use Disorder                          | 53 (6.2%)                     | 59 (8.2%)                     | 60 (7.9%)                     | 72 (10%)                      | 57 (8.9%)                     | 78 (12%)                      | 89 (12%)                      | 89 (13%)                      | 71 (11%)                      | 60 (11%)                      |
| Drug Use Disorders                            | 233 (27%)                     | 241 (33%)                     | 248 (33%)                     | 231 (33%)                     | 252 (40%)                     | 245 (39%)                     | 301 (39%)                     | 271 (38%)                     | 257 (41%)                     | 201 (37%)                     |
| Depressive and Mood Disorders                 | 47 (5.5%)                     | 48 (6.7%)                     | 56 (7.3%)                     | 48 (6.9%)                     | 42 (6.6%)                     | 30 (4.7%)                     | 63 (8.2%)                     | 52 (7.4%)                     | 36 (5.8%)                     | 30 (5.5%)                     |
| Phobia and Anxiety Disorders                  | 35 (4.1%)                     | 37 (5.1%)                     | 33 (4.3%)                     | 34 (4.9%)                     | 32 (5.0%)                     | 41 (6.5%)                     | 45 (5.8%)                     | 53 (7.5%)                     | 43 (6.9%)                     | 37 (6.8%)                     |
| Stress and Adjustment Disorders               | 51 (6.0%)                     | 42 (5.8%)                     | 37 (4.8%)                     | 42 (6.0%)                     | 43 (6.8%)                     | 54 (8.5%)                     | 70 (9.1%)                     | 82 (12%)                      | 71 (11%)                      | 67 (12%)                      |
| Hyperkinetic Disorders                        | 31 (3.7%)                     | 34 (4.7%)                     | 41 (5.4%)                     | 29 (4.2%)                     | 26 (4.1%)                     | 33 (5.2%)                     | 44 (5.7%)                     | 37 (5.2%)                     | 46 (7.4%)                     | 35 (6.4%)                     |
| Personality and Behaviour Disorders           | 33 (3.9%)                     | 41 (5.7%)                     | 38 (5.0%)                     | 34 (4.9%)                     | 44 (6.9%)                     | 42 (6.6%)                     | 65 (8.4%)                     | 71 (10%)                      | 60 (9.6%)                     | 44 (8.0%)                     |
| Non Affective Psychosis                       | 10 (1.2%)                     | 13 (1.8%)                     | 16 (2.1%)                     | 14 (2.0%)                     | 14 (2.2%)                     | 15 (2.4%)                     | 30 (3.9%)                     | 17 (2.4%)                     | 23 (3.7%)                     | 14 (2.6%)                     |
| Bipolar Disorders                             | 20 (2.4%)                     | 17 (2.4%)                     | 13 (1.7%)                     | 8 (1.1%)                      | 11 (1.7%)                     | 11 (1.7%)                     | 16 (2.1%)                     | 16 (2.3%)                     | 11 (1.8%)                     | 14 (2.6%)                     |
| Comorbid SUD with Major Depression            | 19 (2.2%)                     | 12 (1.7%)                     | 21 (2.8%)                     | 17 (2.4%)                     | 15 (2.4%)                     | 12 (1.9%)                     | 20 (2.6%)                     | 18 (2.5%)                     | 18 (2.9%)                     | 12 (2.2%)                     |
| Comorbid SUD with Non-Affective Psychosis     | 6 (0.7%)                      | 10 (1.4%)                     | 12 (1.6%)                     | 12 (1.7%)                     | 11 (1.7%)                     | 11 (1.7%)                     | 20 (2.6%)                     | 10 (1.4%)                     | 18 (2.9%)                     | 12 (2.2%)                     |
| Comorbid SUD with other AXIS-I disorder       | 49 (5.8%)                     | 40 (5.6%)                     | 41 (5.4%)                     | 47 (6.7%)                     | 34 (5.3%)                     | 57 (9.0%)                     | 69 (8.9%)                     | 68 (9.6%)                     | 55 (8.8%)                     | 60 (11%)                      |
| History of dual disorder                      | 84 (9.9%)                     | 82 (11%)                      | 83 (11%)                      | 86 (12%)                      | 82 (13%)                      | 100 (16%)                     | 130 (17%)                     | 120 (17%)                     | 106 (17%)                     | 88 (16%)                      |

<sup>1</sup>Median (IQR); n (%)
